# Supplementary figures and images for: Effects of Diet and Exercise-Induced Weight Loss on Biomarkers of Inflammation in Breast Cancer Survivors: A Systematic Review and Meta-analysis
Source: Oxford University Press journal article supplement (doi:10.1158/1055-9965.epi-20-1029), 2021-03-18

Supplement Figure S1


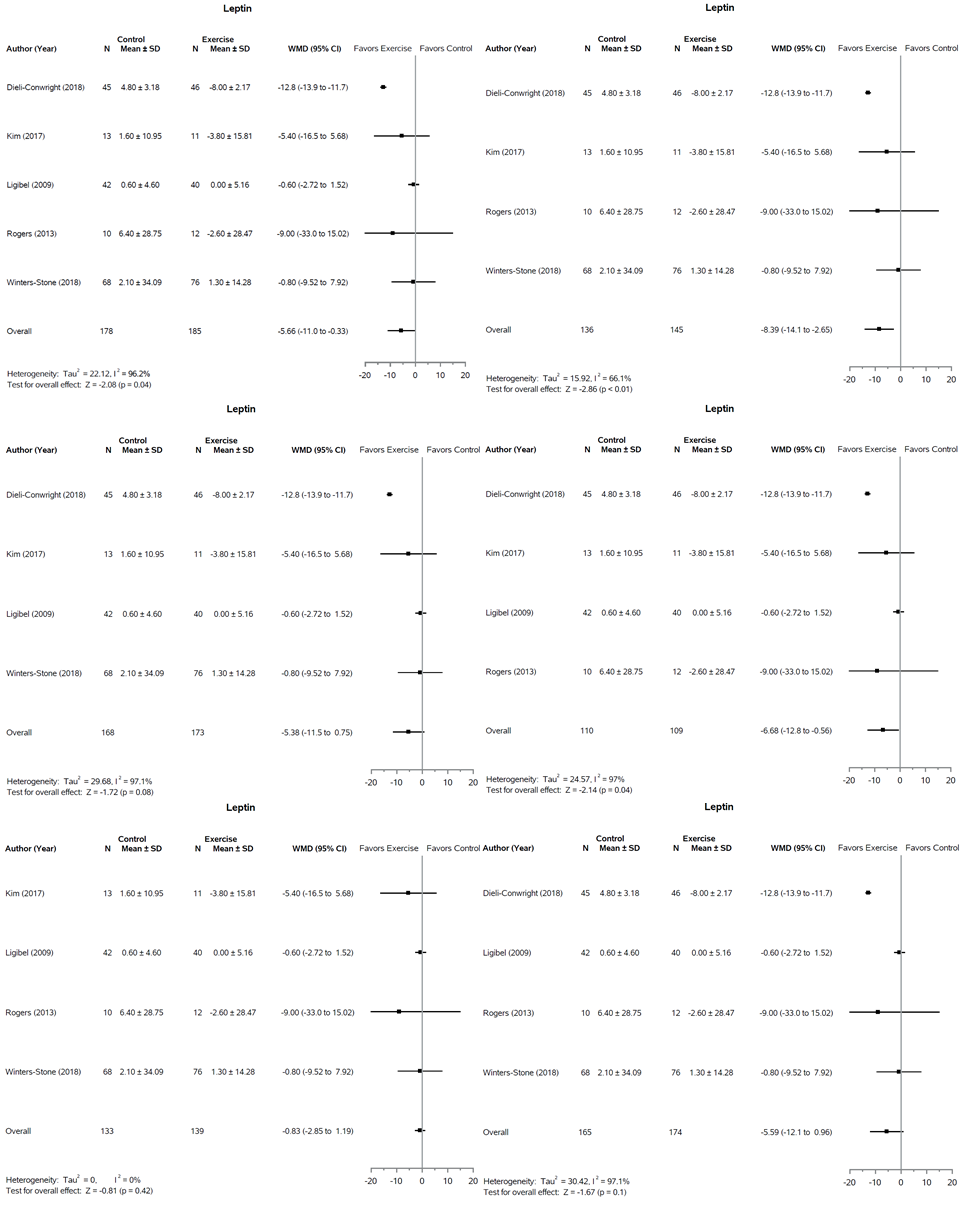


Sensitivity analysis of leptin results in the exercise group

Supplement: 10559965epi201029-sup-246776_3_supp_6923364_q7lv77.docx [file 10559965epi201029-sup-246776_3_supp_6923364_q7lv77.docx]
